1 **A single, improbable B cell receptor mutation confers potent neutralization against cytomegalovirus**

2

3 **Authors:** Jennifer A. Jenks,<sup>1</sup> Sharmi Amin,<sup>1</sup> Amit Kumar,<sup>1</sup> Madeline R. Sponholtz,<sup>2</sup> Daniel Wrapp,<sup>2</sup> Sravani

4 Venkatayogi,<sup>1</sup> Joshua Tu,<sup>1</sup> Jason S. McLellan,<sup>2</sup> Kevin Wiehe,<sup>1,3†</sup> Sallie R. Permar<sup>1,4\*†</sup>

5

6 **Affiliations:**

7 1. Duke Human Vaccine Institute, Duke University Medical Center, Durham, NC 27710.

8 2. Department of Molecular Biosciences, The University of Texas at Austin, Austin, TX, USA 78712.

9 3. Department of Medicine, Duke University School of Medicine, Durham, NC 27710.

10 4. Department of Pediatrics, Weill Cornell Medicine, New York, NY 10065.

11 \* Corresponding Author and Lead Contact: Sallie R. Permar <[sallie.permar@med.cornell.edu](mailto:sallie.permar@med.cornell.edu)>, 212-  
12 746-4111.

13 † These authors contributed equally to this work.

14 **Abstract**

15 Cytomegalovirus (CMV) is a leading cause of infant hearing loss and neurodevelopmental delay, but  
16 vaccine candidates have faced challenges eliciting neutralizing antibodies. One of the most well-studied  
17 targets for CMV vaccines is the viral fusogen glycoprotein B (gB), which is required for viral entry into host  
18 cells. Within gB, antigenic domain 2 site 1 (AD-2S1) is a target of potently neutralizing antibodies, but gB-  
19 based candidate vaccines have yet to elicit robust responses against this region. We mapped the  
20 genealogy of B cells encoding potently neutralizing anti-gB AD-2S1 antibodies from their inferred unmutated  
21 common ancestor (UCA) and characterized the binding and function of early lineage ancestors.  
22 Remarkably, we found that the single amino acid heavy chain mutation A33N, an improbable mutation  
23 rarely generated by somatic hypermutation machinery, conferred broad CMV neutralization to the UCA  
24 antibody. Structural studies revealed that this mutation mediated key contacts with the gB AD-2S1 epitope.  
25 Collectively, these results provide insight into potently neutralizing gB-directed antibody evolution and a  
26 foundation for designing next-generation CMV vaccines.

27

28 **One-sentence summary**

29 This manuscript identifies an early B cell lineage mutation that confers neutralizing function to antibodies  
30 targeting CMV fusogen gB.

## 31 Introduction

32 Human cytomegalovirus (CMV, human herpesvirus 5) is a pervasive viral pathogen and major cause  
33 of disease in infants and immunocompromised patients worldwide (1, 2). Although CMV infection is typically  
34 asymptomatic in healthy adults, CMV transmission *in utero* can cause permanent hearing loss, cognitive  
35 impairment, retinitis, and cerebral palsy in affected infants (3). Congenital CMV infection alone is  
36 responsible for nearly a quarter of all newborn hearing loss (4). CMV infection is also a major cause of  
37 morbidity and mortality in transplant recipients and persons with HIV (5). Accordingly, there have been  
38 many efforts to develop vaccines that will prevent infection and transmission with the goal of reducing the  
39 global CMV-related burden of disease (6). However, vaccine development has faced challenges identifying  
40 immunogens that can induce broad and potent immunity and confer sustained protection against CMV  
41 infection (7).

42 One of the leading targets for vaccine development is CMV glycoprotein B (gB), which is a viral  
43 envelope protein that mediates fusion with host-cell membranes and is required for viral entry into all known  
44 cell types (8, 9). Indeed, the most efficacious CMV vaccine trial to date was composed of a postfusion CMV  
45 gB subunit protein combined with an MF59 adjuvant (gB/MF59) that conferred approximately 50%  
46 protection from primary acquisition in multiple phase 2 clinical trials (10-13). Follow-up immunogenicity  
47 studies found that in CMV-seronegative vaccinees, gB/MF59 elicited antibody responses against three of  
48 the four total neutralizing antigenic domains of gB (14, 15) but not against gB antigenic domain-2 site 1 (AD-  
49 2S1), which is known to be the target of potently neutralizing antibodies in natural infection (16).

50 CMV gB AD-2S1 is a linear epitope at the N-terminus of gB (amino acids 68–81), which is  
51 extracellular, and is highly conserved across clinical strains (17). Multiple studies have implicated antibodies  
52 against gB AD-2S1 in protection from CMV disease and vertical transmission. In CMV-seropositive renal  
53 transplant recipients, the presence of serum anti-gB AD-2S1 antibodies was associated with reduced risk of  
54 post-transplant CMV disease (18). In CMV-seropositive transplant recipients immunized with gB/MF59,  
55 vaccination boosted anti-gB AD-2S1 serum antibody titers in a subset of subjects with preexisting anti-gB  
56 AD-2S1 antibodies, and these titers were associated with protection from CMV viremia (19). We also found  
57 that in a study of *in utero* CMV transmission among HIV-infected mothers, the presence of maternal serum  
58 antibodies against gB AD-2S1 was associated with a reduced risk of vertical CMV transmission (20). As

59 elicited in the context of natural infection, antibodies targeting gB AD-2S1 are well recognized for their role  
60 in protection from CMV viremia and congenital transmission.

61 Based on its location at the extracellular N-terminus, gB AD-2S1 should be readily available for  
62 immune recognition. Yet, surprisingly, only ~50% of naturally CMV-infected individuals have detectable  
63 circulating anti-gB AD-2S1 antibodies (21). Vaccine candidates to date including gB/MF59 have failed to  
64 elicit antibodies targeting this region (14, 15), and direct immunization with gB AD-2S1 peptides in animal  
65 models has also failed to elicit neutralizing antibody responses (21). These findings indicate the presence of  
66 barriers, such as structural constraints within gB and host genetic restriction, that prevent the generation of  
67 neutralizing antibodies targeting gB AD-2S1. Indeed, there are two known glycosylation sites within gB AD-  
68 2S1 that may contribute to glycan shielding, and crystal structures of postfusion gB suggest that the nearby  
69 gB antigenic domain-1 may cloak the gB AD-2S1 region, blocking immune access to this epitope (17).

70 The host genetic restriction of germline B cells may also prevent the generation of neutralizing anti-  
71 gB AD-2S1 antibodies. Germline B cell receptors can have thousands of potential heavy ( $V_H$ ) and light ( $V_L$ )  
72 pairings, yet all of the potently neutralizing gB AD-2S1 monoclonal antibodies (mAbs) isolated from naturally  
73 infected individuals to date are derived from the same  $V_H/V_L$  pairing: IGHV3-30 (or the related IGHV3-30-3)  
74 and IGKV3-11 (22-24). The use of a single pairing out of thousands of potential combinations reflects the  
75 incredibly small subset of germline B cells with complementarity-determining regions (CDRs) capable of  
76 recognizing gB AD-2S1. Thus, the elicitation of gB AD-2S1-specific antibodies by vaccination likely requires  
77 rational vaccine design that addresses potential germline restriction and lineage maturation.

78 B cell lineage-targeted vaccine design aims to direct germline B cells along favorable maturation  
79 pathways, such as those targeting gB AD-2S1. In this approach, the germline B cell precursor sequence of  
80 clonally related antibodies with desired neutralizing potency is inferred using phylogenetic methods, then  
81 the amino acid mutations associated with the development of neutralizing functions along lineage  
82 maturation are identified. Antibodies with or without these functional mutations can then be produced and  
83 used as templates for structure-based immunogen design or for the empiric screening of vaccine  
84 immunogens. B cell lineage-targeted vaccine design has been used to guide the development of vaccine  
85 candidates that are designed to generate broadly neutralizing antibodies against HIV-1 (25-29) and

86 influenza (30). However, this approach has not yet been applied to herpes viruses such as CMV, which  
87 could be a boon for their vaccine development.

88 When considering structure-based vaccine design for engaging germline B cell receptors, we are  
89 particularly interested in identifying function-enabling somatic hypermutations that may require high-affinity  
90 antigenic stimulation. These mutations may occur infrequently during normal affinity maturation due to 1)  
91 the location of these mutations in areas of the germline that are rarely targeted by activation-induced  
92 deaminase (AID) during somatic hypermutation and/or 2) the requirement of multiple nucleotide mutations  
93 within a codon to introduce an observed amino acid substitution (31). However, these functional,  
94 “improbable” amino acid mutations could be targeted for high-affinity immunogen stimulation by structure-  
95 based vaccine design.

96 Based on the low prevalence of gB AD-2S1 antibodies in CMV-seropositive individuals, we  
97 hypothesized that potently neutralizing antibodies against CMV gB AD-2S1 are lineage-restricted through  
98 the requirement of improbable AID mutations for binding and neutralizing functions. To address this  
99 hypothesis, we examined the lineage maturation of a well-studied, potently neutralizing gB AD-2S1-specific  
100 mAb called TRL345 (16, 32). TRL345 was isolated from single B cell clones from a CMV-seropositive donor  
101 with high plasma CMV-neutralizing activity, and based on its potent, broad neutralization of CMV, this mAb  
102 was pursued as a potential passive therapeutic to treat CMV viremia (16, 23, 32).

103 In this study, we mapped the clonal genealogy of TRL345 from its germline precursor and produced  
104 antibodies from its clonal family including inferred ancestral antibodies as well as mature antibodies. Then,  
105 using a computational program to estimate the probability of individual amino acid mutations along  
106 maturation pathways, we identified a single improbable heavy chain mutation required for mAb binding and  
107 neutralization, which could serve as the basis for CMV gB-based immunogen design to target potent CMV  
108 neutralization.

109

## 110 **Results**

### 111 *Identification of the TRL345 clonal lineage*

112 We first reconstructed the clonal genealogy of the highly neutralizing gB AD-2S1 mAb TRL345 using a set  
113 of previously published mature gB AD-2S1 mAb sequences isolated from the same donor (16, 32). Using

114 the antibody sequence analysis program Cloanlyst, we grouped the 14 reported mature AD-2S1 mAb  
115 sequences into clones. The clone that included mAb TRL345 was comprised of 9 members and utilized a  
116 IGHV3-30\*01 and IGKV3-11\*01 pairing, which is consistent with the heavy and light chain V gene segment  
117 pairings identified for all previously published gB AD-2S1 mAbs (16, 22, 33-35). With the 9 TRL345 clonal  
118 sequences as input, we then used Cloanlyst to infer the unmutated common ancestor (UCA) sequence  
119 representing the B cell receptor of the naïve B cell that gave rise to the TRL345 clone, as well as a  
120 maximum likelihood genealogical tree of its clonal lineage (**Fig. 1**).

121

### 122 *High affinity gB AD-2 recognition was acquired early in the TRL345 lineage*

123 After producing the 9 mature mAbs, 8 clonal ancestor intermediates, and UCA mAbs, we measured their  
124 binding to gB. The UCA had relatively low binding affinity to both gB AD-2S1 peptide and gB ectodomain  
125 (**Fig. 1, 2A, 2B; Table S1**). However, upon transition from the UCA to the first intermediate (intermediate 8,  
126 I8), ELISA binding magnitude for gB AD-2S1 peptide and gB ectodomain increased 151-fold and 37-fold,  
127 respectively. Binding affinity for the linear gB AD-2S1, as measured by surface plasmon resonance (SPR),  
128 remained unchanged in the UCA to I8 transition, but affinity for gB ectodomain increased 32-fold, to its  
129 binding plateau (**Fig. 1, 2B, 2C; Table S1**). Upon evolution of I8 to the second intermediate (I4) in the  
130 TRL345 lineage, affinity for the linear gB AD-2S1 increased 5-fold. The high binding magnitude and affinity  
131 for both gB AD-2S1 and ectodomain were retained from I4 throughout the rest of the lineage (**Fig. 1, 2A-C;**  
132 **Table S1**). Together, the data indicate that high affinity recognition of the AD2 epitope is mediated by the  
133 naïve TRL345 B cell and that affinity maturation plateaus by the first or second intermediates along the  
134 TRL345 lineage.

135

136 Because the gB ectodomain soluble protein may not adequately mimic either the prefusion or postfusion  
137 state of gB on the viral envelope or infected cells (17, 36, 37), we measured mAb binding to full-length gB  
138 as expressed on the surface of human epithelial cells, which is a desirable immunogenicity target given that  
139 IgG binding to gB expressed on the surface of a cell was identified as an immune correlate of protection  
140 against CMV (38). Of note, gB expression on the surface of a cell may represent a combination of prefusion  
141 and postfusion gB forms (17). Although the UCA had negligible binding to gB AD-2S1 peptide and soluble

142 gB ectodomain, the UCA showed moderate binding to cell-associated gB (AUC of a 3-point dilution series=  
143  $97.3 \pm 21.2$ ) (**Fig. 2D; S1; Table S1**). Binding magnitude for cell-associated gB improved after maturation  
144 from UCA to I8 (AUC=  $132.6 \pm 33.3$ ) then remained stable along the lineage maturation to TRL345 (AUC=  
145  $151.6 \pm 20.8$ ).

146

#### 147 *Broad neutralization of CMV was acquired early in the TRL345 lineage*

148 We then quantified the neutralization activity of the TRL345 lineage mAbs against three CMV strains, each  
149 of which expressed a different gB genotype. We measured the neutralization of CMV strains Towne (gB  
150 genotype 1), AD169 repaired (AD169rUL131-GFP, genotype 2), and Toledo (genotype 3) on MRC-5  
151 fibroblasts and neutralization of AD169rUL131-GFP on ARPE epithelial cells. The UCA did not neutralize  
152 any CMV strains on either fibroblasts (**Fig. 1, 2E; Table S1**) or epithelial cells (**Fig. 2F; Table S1**), but it  
153 acquired broad neutralization activity in its first lineage branch at I8 (fibroblast neutralization  $IC_{50}$  of Towne,  
154 AD169rUL131-GFP, and Toledo =  $2.78 \pm 3.40 \mu\text{g/mL}$ ,  $0.83 \pm 0.72 \mu\text{g/mL}$ , and  $0.83 \pm 0.10 \mu\text{g/mL}$ ,  
155 respectively; Epithelial cell  $IC_{50}$  of AD169rUL131-GFP =  $0.79 \pm 0.17 \mu\text{g/mL}$ ). Neutralizing activity further  
156 improved along lineage maturation, with 4.8-fold and 2.2-fold increases in average CMV neutralization on  
157 fibroblasts and epithelial cells, respectively, after the I8 maturation to I4. The most potently neutralizing  
158 antibodies on fibroblasts ( $IC_{50} < 0.25 \mu\text{g/mL}$ ) were TRL345, MAB310 (I3), and MAB313, and on epithelial  
159 cells ( $IC_{50} < 0.35 \mu\text{g/mL}$ ) were TRL345, MAB343, MAB310 (I3), and MAB313 (**Fig. 1; Table S1**).

160

#### 161 *Early acquired amino acid mutations were improbable in the absence of B cell selection*

162 We next investigated the probability of each mutation occurring in the absence of B cell selection. During B  
163 cell development in germinal centers, B cells undergo somatic hypermutation, wherein AID generates DNA  
164 point mutations at immunoglobulin variable regions (39). B cells with mutations that improve antigen binding  
165 avidity undergo subsequent selection. Due to codon degeneracy and biases in AID targeting, certain amino  
166 acid changes occur more frequently than others during somatic hypermutation (40). The acquisition of  
167 improbable mutations that contribute to neutralization function can act as rate-limiting steps in the  
168 development of neutralizing antibodies (27) and represent high value targets for selection in lineage-based  
169 vaccine design strategies (28). We used the ARMADiLLO computational program to simulate somatic

170 hypermutation and estimate the probability of each observed mutation in the TRL345 clone (27). Consistent  
171 with previous studies, we defined “improbable” mutations as those estimated to occur at <2% frequency in  
172 the absence of selection – a frequency corresponding to approximately one mutation per clone per germinal  
173 center (27). We found that all of the mutations acquired by the UCA during its evolution to I8, namely the V<sub>H</sub>  
174 A33N and Y52aN and V<sub>L</sub> S30G and N53D, were improbable in the absence of B cell selection (**Fig. 1;**  
175 **Table S2**). Throughout the lineage, of the total 62 heavy chain mutations observed, 7 occurred in CDR1  
176 and 10 in CDR2 regions, with none observed in CDR3. Of the total 29 light chain mutations observed, 6  
177 occurred in CDR1, 1 in CDR2, and 4 in CDR3 (**Fig. 1**). Of the heavy and light chain mutations in the  
178 lineage, 37% (23 of 62) and 59% (17 of 29) were estimated to be improbable in the absence of selection,  
179 respectively. In TRL345 alone, 6 of 12 total observed heavy chain mutations and 2 of 7 total light chain  
180 mutations were improbable (**Fig. 1; Table S2**).

181

### 182 *Early, improbable mutations in the UCA were both necessary and sufficient for neutralization*

183 To identify which early mutations conferred neutralizing activity to the UCA, we performed site-directed  
184 mutagenesis to either 1) revert the mutations in I8 back to germline or 2) introduce the mutations into the  
185 UCA. We produced 14 mutant mAbs with single heavy chain mutations A33N and Y52aN or light chain  
186 mutations S30G and N53D or combinations of these mutations, then we quantified mAb binding and  
187 neutralization. We found that reversion of single mutations V<sub>H</sub> Y52aN, V<sub>L</sub> S30G, or V<sub>L</sub> N53D in I8 had  
188 negligible impact on mAb binding to gB AD-2S1, gB ectodomain, and cell-associated gB (**Fig. 3A, B; S2A,**  
189 **B**). However, reversion of V<sub>H</sub> A33N in I8 decreased binding magnitude to gB AD-2S1, gB ectodomain, and  
190 cell-associated gB by 395-fold, 1.7-fold, and 1.4-fold, respectively.

191

192 Introduction of V<sub>H</sub> A33N to the UCA conferred a 269-fold, 45-fold, and 2.5-fold increase in binding  
193 magnitude to the gB AD-2S1 linear epitope, gB ectodomain, and cell-associated gB, respectively (**Fig. 3A,**  
194 **B; S2A, B**). By contrast, introduction of V<sub>L</sub> S30G conferred only 1.8-fold, 13.5-fold, and 1.2-fold increases in  
195 binding magnitude to the gB AD-2S1 linear epitope, gB ectodomain, and cell-associated gB, respectively.  
196 Introduction of the single mutations V<sub>H</sub> Y52aN or V<sub>L</sub> N53D conferred 2.0-fold and 8.7-fold increases in  
197 binding magnitude to gB ectodomain, respectively, but they had negligible effect on binding to gB AD-2S1



198 or cell-associated gB. Early, improbable mutations introduced in combination to the UCA demonstrated  
199 binding patterns consistent with the single mutants. Thus, mutant mAbs containing V<sub>H</sub> A33N had increased  
200 binding to gB AD-2S1 linear domain, gB ectodomain, and cell-associated gB, and this pattern was not  
201 observed for any other early mutation (**Fig. 3A, B; S2A, B**).

202

203 We then determined the role of these early mutations in mAb neutralizing function. We found that reversion  
204 of V<sub>H</sub> Y52aN in I8 had negligible impact on neutralization on both fibroblasts and epithelial cells (**Fig. 3C;**  
205 **S2C, D**). Reversion of V<sub>L</sub> S30G and N53D moderately decreased neutralization of all strains, with the  
206 largest impacts on Towne neutralization as observed by decreases in neutralization potency of 9.0-fold and  
207 2.5-fold, respectively. By contrast, reversion of V<sub>H</sub> A33N abrogated neutralizing function of all strains on  
208 both fibroblasts and epithelial cells. Introduction of the single heavy chain Y52aN or light chain mutations  
209 S30G or N53D to the non-neutralizing UCA did not confer neutralization function. Only introduction of the  
210 heavy chain A33N mutation conferred neutralizing function, and this was observed for neutralization of all  
211 three CMV strains and on both cell types. Consistent with the binding patterns of these mutant mAbs, these  
212 neutralization results indicate that the improbable heavy chain A33N mutation was both necessary and  
213 sufficient for neutralization across multiple CMV strains.

214

#### 215 *Heavy chain mutations A33N and A33G confer neutralizing activity in germline mAbs*

216 All human gB AD-2S1-specific mAbs sequenced to date are derived from the IGHV3-30 (or related IGHV3-  
217 30-3) and IGKV3-11 germline pairing and are associated with either a V<sub>H</sub> G33 or V<sub>H</sub> D33 residue in the  
218 mature mAb sequence (41). We anticipated that the germline V<sub>H</sub> mutations A33N and A33G might  
219 represent two alternative pathways to achieve neutralization potency.

220

221 To determine the functional role of the V<sub>H</sub> mutation A33G, we introduced this mutation to the non-  
222 neutralizing TRL345 UCA and found that this mutation conferred approximately 15.0-fold and 14.2-fold  
223 increases in binding to gB AD-2S1 and gB ectodomain, respectively, with a minimal increase of 1.1-fold in  
224 binding to cell-associated gB (**Fig. 4A, B**). However, this mutation did not confer CMV neutralizing activity  
225 on fibroblasts or epithelial cells (**Fig. S3A**).

226

227 We also evaluated the comparative advantages of the V<sub>H</sub> A33N and V<sub>H</sub> A33G mutations to the UCA of  
228 another donor. To identify a UCA with a CDR3 region capable of binding gB AD-2S1, we computationally  
229 inferred the UCA from the-mAb 3-25 (42). The 3-25 UCA was inferred to use the IGHV3-30\*01 allele, which  
230 encodes an alanine at V<sub>H</sub> residue 33 (**Fig. S4A, B**). We found that the 3-25 UCA had low binding to gB AD-  
231 2S1 (EC<sub>50</sub>>10 µg/mL) and moderate binding to gB ectodomain (6.1 ± 1.2 µg/mL) and cell-associated gB  
232 (22.1 ± 1.8 µg/mL. **Fig. 4C, D**). Introduction of V<sub>H</sub> A33N to the 3-25 UCA conferred binding to gB AD-2S1  
233 (2.7 ± 2.5 µg/mL) and increased binding magnitude to gB ectodomain and cell-associated gB by 35.2-fold  
234 and 4.4-fold, respectively. By contrast, introduction of naturally observed mutation, V<sub>H</sub> A33G, to the 3-25  
235 UCA conferred minimal binding, with increases of 1.3-fold, 5.5-fold, and 1.4-fold to gB AD-2S1, gB  
236 ectodomain, and cell-associated gB, respectively (**Fig. 4C, D**). When introduced into the 3-25 mAb UCA,  
237 neither the V<sub>H</sub> A33N mutation nor A33G mutation was sufficient to confer CMV neutralizing activity (**Fig.**  
238 **S4B**), suggesting that there may be other mutations required to develop this function for germline pairings  
239 different from the IGHV3-30\*01 and IGKV3-11\*01 used in TRL345.

240

#### 241 *Molecular determinants of gB AD-2S1 linear epitope binding and neutralizing potency*

242 To obtain high-resolution information on the binding of the early intermediate mAb I8 to the gB AD-2S1  
243 linear epitope, we conducted crystallographic studies of TRL345.I8 antigen-binding fragment (Fab) in  
244 complex with the linear gB AD-2S1 peptide (65-HRANETIYNTTLKYG-79). A crystal in the space group  
245 *P2<sub>1</sub>2<sub>1</sub>2<sub>1</sub>* with one complex per asymmetric unit diffracted X-rays to a resolution of 1.8 Å. Following molecular  
246 replacement and manual building of the model, the structure was refined to an R<sub>work</sub>/R<sub>free</sub> of 15.0%/17.4%  
247 (**Table S3**). This high-resolution structure revealed hydrogen bonding between the side chain of Y78 of the  
248 gB AD-2S1 peptide and the side chains of V<sub>H</sub> N33 and N52a (both the result of improbable mutations),  
249 anchoring the C-terminus of the peptide in a pocket formed by N33 of V<sub>H</sub> CDR1, N52a and N57 of V<sub>H</sub>  
250 CDR2, and the V<sub>H</sub> CDR3 loop (**Fig. 5A, B**). The side chain of E69 of gB AD-2S1 hydrogen bonds with the  
251 side chain of Y32 of V<sub>H</sub> CDR1, anchoring the N-terminus of the peptide, and the side chain of T74 of gB AD-  
252 2S1 forms hydrogen bonds with the sidechain S98 and the mainchain of V99 of V<sub>H</sub> CDR3 (**Fig. 5B**).

253

254 We then compared the TRL345.I8 structure with the previously published structure of the potentially  
255 neutralizing gB AD-2S1-specific mature mAb 3-25 in complex with gB AD-2S1 (PDB ID: 6UOE), which also  
256 uses the IGHV3-30 and IGKV3-11 pairing (17, 35, 37, 43). The structures of the peptides in the two  
257 complexes are highly similar, with an RMSD of 0.9 Å for 11 C $\alpha$  atoms, despite numerous amino acid  
258 differences in the heavy chain at the binding interface (**Fig. 5B-D, S4A-B**). The structural similarity of the  
259 peptide suggests that this particular conformation of gB AD-2S1 may represent the conformation that this  
260 epitope adopts in the prefusion form of gB. Interactions between gB AD-2S1 and the V<sub>L</sub> of 3-25 are  
261 recapitulated in the TRL345.I8 complex, with the side chain and main chain of N73 of gB AD-2S1 hydrogen  
262 bonding with the side chains of Y32 and R91 of the V<sub>L</sub> CDR1 and CDR3, respectively, and the side chain of  
263 gB T75 hydrogen bonding with the side chain of V<sub>L</sub> CDR3 W94 (**Fig. 5D**). Notably, these interactions  
264 recapitulated in both the TRL345.I8 and 3-25 complexes occur at shared germline-encoded amino acids  
265 (**Fig. 1, S4A-B**). Moreover, in both complexes, the main chain atoms of gB AD-2S1 T75, L76, and Y78 and  
266 the side chain of T75 form hydrogen bonds with main chain atoms of the V<sub>H</sub> CDR3. However, whereas the  
267 side chain of gB AD-2S1 T74 hydrogen bonds with the side chain of S98 of the TRL345.I8 V<sub>H</sub> CDR3, the  
268 side chain of T74 hydrogen bonds with the main chain of C98 of the 3-25 V<sub>H</sub> CDR3, the side chain of which  
269 forms a disulfide bond with C100B, stabilizing the longer 3-25 mAb CDR3 loop (the 3-25 V<sub>H</sub> CDR3 is one  
270 residue longer than TRL345.I8 V<sub>H</sub> CDR3).

271

272 In assessing both the general similarity and key differences in the interactions between the early TRL345  
273 intermediate and mature mAbs with gB AD-2S1, we have identified a structural basis for the increase in  
274 binding affinity following the transition from the UCA of TRL345 to I8 and suggest that there may be multiple  
275 pathways to developing potentially neutralizing responses against CMV.

## 276 Discussion

277 Advancements in the antibody-to-vaccine approach have successfully enabled the translation of  
278 antibody lineages and structures to effective vaccine immunogens. Recently, structure-based design was  
279 used to engineer a candidate vaccine against RSV by stabilizing the prefusion F conformation and  
280 preserving neutralization-sensitive epitopes on the vaccine antigen (44, 45). For CMV, structure-based  
281 vaccine design of CMV gB to elicit potent neutralization has faced challenges, partly due to the high  
282 flexibility of the gB AD-2S1 region, a target of broadly and potently neutralizing antibodies. Previous  
283 structural studies of the full-length gB protein, in both the prefusion and postfusion conformations, have not  
284 been able to resolve the gB AD-2S1 conformation (17, 35, 37, 43, 46). The recently solved prefusion  
285 structure, in which AD-2 remained unresolved, suggested that the N-terminal flexible region containing gB  
286 AD-2 may bind gH/gL to initiate fusion (46). In our study, we solved the atomic structure of a gB AD-2S1  
287 peptide bound by an early B cell precursor mAb, which may represent the structure of the gB AD-2S1 linear  
288 region capable of eliciting potently neutralizing antibodies. Thus, stabilization of the gB AD-2S1 peptide in  
289 this conformation may be the next key step in the design of a next-generation gB candidate vaccine.

290 This study revealed that only a low level of mAb affinity maturation is required for gB AD-2S1-  
291 specific antibody precursors to achieve CMV neutralization, as a single mutation in the heavy chain of the B  
292 cell receptor germline was both necessary and sufficient to confer potent neutralizing function (Fig. 1, 2).  
293 Addition of this single, key mutation  $V_H$  A33N also conferred binding function to the UCA from another donor  
294 to an even greater magnitude than the naturally observed mutation  $V_H$  A33G. By comparison, broadly  
295 neutralizing antibodies against HIV-1 require multiple mutations and can lose neutralizing function along  
296 lineage maturation, posing significant challenges for mutation-guided vaccine design strategies (47). Thus,  
297 our study lays a foundation for attainable, rational CMV gB vaccine design.

298 We identified the structural basis of affinity maturation from the TRL345 UCA to early intermediate  
299 mAbs. In particular, the  $V_H$  A33N and Y52aN mutations enabled hydrogen bonding to the side chain of Y78  
300 of the gB AD-2S1 peptide, anchoring the C-terminus of the peptide in a pocket (Fig. 5B). Notably, the  
301 mature TRL345 mAb contains an N52aI substitution, indicating that there may be key differences between  
302 the structures of early lineage and mature mAbs in binding to the flexible peptide. Moreover, there were

303 several differences in the interactions between gB AD-2S1 and either TRL345 I8 or the mature 3-25 mAb,  
304 suggesting that there may be multiple pathways to developing potentially neutralizing responses against CMV.

305 This study has several limitations. Due to the limited number of anti-gB AD-2S1 B cell clones  
306 sequenced to date, we were only able to investigate the anti-gB AD-2S1 B cell lineage of a single donor.  
307 Accordingly, we were not able to observe whether there may be parallel evolution of key mutations in other  
308 donors. Follow-up studies are needed to determine whether the V<sub>H</sub> A33N mutation can confer gB AD-2S1  
309 binding and neutralization function to germline mAbs in other donors that share genetic and structural  
310 characteristics. Moreover, the role of potential allelic variation at V<sub>H</sub> residue 33 should be explored.

311 There are additional challenges facing this approach for vaccine design. This study does not  
312 address the level of antigen affinity required to target germline B cell precursors *in vivo*. Follow-up studies  
313 should be performed to create gB antigens with high binding affinity to B cell precursors of gB AD-2S1-  
314 binding mAbs and test them in animal models for their ability to elicit gB AD-2S1-specific antibodies. Ideally,  
315 these studies would be performed in models with human gene knock-ins that are representative of the  
316 germline repertoire of human B cells. Furthermore, there may be low inherent frequency of these B cell  
317 precursors across donors, which should be assessed in unbiased B cell repertoire sequencing studies.  
318 Additionally, the current versions of algorithms used in this study do not calculate the probability of  
319 insertions or deletions in the antibody clonal lineages, which may identify additional targets, and this vaccine  
320 strategy is limited in its ability to elicit these types of mutations.

321 Our combined approach of B cell receptor sequence analyses, computational modeling, x-ray  
322 crystallography, and functional assessments of CMV gB AD-2S1 mAbs enabled the identification of gB AD-  
323 2S1 peptide structure which may be capable of eliciting the maturation of neutralizing antibodies from non-  
324 neutralizing early lineage precursors. The gB AD-2S1-specific early antibody intermediates and gB AD-2S1  
325 peptide structures could serve as novel, valuable tools to guide the design of the next-generation of CMV  
326 gB-based vaccines.

## 327 **Materials and Methods**

### 328 *Study design*

329 The objectives of this study were to assess whether potentially neutralizing antibodies against CMV gB AD-  
330 2S1 are lineage-restricted through the requirement of improbable AID mutations for binding and neutralizing  
331 functions. To address this hypothesis, we evaluated the following experimental units: 18 mAbs in the clonal  
332 genealogy of the neutralizing gB AD-2S1 mAb TRL345 (16, 32) including the TRL345.UCA, 14 mutated  
333 TRL345.UCA mAbs with single or combinations of early lineage mutations, the potentially neutralizing mAb 3-  
334 25 (42), the 3-25.UCA, and 2 mutated 3-25.UCA mAbs. In each experiment, each sample was run in  
335 duplicate, and each experiment was performed two or more times.

336

### 337 *Peptide production*

338 The gB AD-2S1 peptide was synthesized by ThermoFisher as the sequence HRANETIYNTTLKYG, which  
339 includes the underlined, minimal gB AD-2S1 epitope. The gB ectodomain protein was produced in-house.

340

### 341 *Production of lineage mAbs and mutant mAbs*

342 Antibody genes were synthesized by Genscript and recombinantly produced in a human IgG backbone.  
343 Single amino acid mutations were introduced or reverted by site-directed mutagenesis, using the  
344 QuikChange Lightning Multi Site-Directed Mutagenesis Kit (Agilent) according to manufacturer's protocol.  
345 Sequence efficiency was confirmed by Sanger sequencing.

346

### 347 *mAb binding to soluble peptides and proteins by ELISA*

348 mAb binding to gB AD-2S1 peptide and gB ectodomain were measured by 384-well plate ELISA. Plates  
349 were coated overnight at 4°C with 45 ng gB AD-2S1 or gB ectodomain per well then blocked in assay  
350 diluent (1× PBS pH 7.4 containing 4% whey, 15% normal goat serum, and 0.5% Tween-20). mAbs were  
351 plated in a 12-point 3-fold serial dilution at a starting concentration of 1 µg/mL (1 µg/mL to 5.7\*10<sup>-6</sup> µg/mL),  
352 in duplicate. Binding was detected by goat-anti human HRP-conjugated IgG secondary (Jackson  
353 ImmunoResearch). Plates were developed using the SureBlue Reserve tetramethylbenzidine (TMB)

354 peroxidase substrate (KPL). Data are reported as the half-maximal effective concentration ( $EC_{50}$ ). Each  
355 mAb was run in two or more independent experiments.

356

357 *mAb binding to soluble peptides and proteins by surface plasmon resonance (SPR)*

358 The kinetics and affinity of the binding interactions between monoclonal antibodies and the CMV gB  
359 ectodomain protein and the CMV gB AD-2S1 peptide were assessed by surface plasmon resonance (SPR)  
360 on a Biacore T200 platform (Cytiva) at 25°C in HBS-EP+ (10 mM HEPES, 150 mM NaCl, 3 mM EDTA,  
361 0.05% v/v Surfactant P20, pH 7.4) running buffer. Monoclonal antibodies (10 µg/mL) were non-covalently  
362 captured on the surface of a Series S Sensor Chip Protein A (Cytiva) by injection for 60 seconds at a flow  
363 rate of 5 µL/min. Single-cycle kinetic titration analyses were performed by sequential 180 second injections  
364 of 5 antigen concentrations, followed by a 1200 second dissociation phase, at 30 µL/min. The CMV gB  
365 ectodomain protein was assayed in a two-fold dilution series from 1.25-20 µg/mL, and the CMV gB AD-2S1  
366 peptide was assayed in a two-fold dilution series from 6.25-100 ng/mL. The Protein A surface was  
367 regenerated after each antigen injection with a 30 second injection of 10 mM glycine-HCl, pH 2.0, at a flow  
368 rate of 30 µL/min, allowing for subsequent analysis of all mAb-antigen pairs. Binding data was analyzed  
369 using the Biacore T200 Evaluation software (v2.0, Cytiva). Binding profiles were reference subtracted using  
370 a negative control Synagis mAb (anti-flu) surface and running buffer injections. Curve fitting analysis was  
371 performed using either a 1:1 Langmuir model or a heterogeneous ligand model. For interactions fit with the  
372 heterogeneous ligand model, affinities were calculated using the fast kinetic components of the model fit.  
373 Some interactions reported dissociation rate constants ( $k_d$ ) beyond the limit of detection of the software  
374 ( $<1.00 \times 10^{-5} \text{ s}^{-1}$ ). In such cases, the values were recorded as  $1.00 \times 10^{-5}$  and affinity calculations are  
375 reported as the upper limit of the respective value.

376

377 *mAb binding to cell-associated gB*

378 HEK293T cells at 50% confluency in a T75 flask were cotransfected using the Effectine Transfection  
379 Reagent (Qiagen) with DNA plasmids expressing GFP (gift of Maria Blasi, Duke University) with or without  
380 plasmids expressing the full-length gB ORF from the autologous Towne strain (SinoBiological). After  
381 incubation for 2 days at 37°C and 5% CO<sub>2</sub>, transfected cells were washed with Dulbecco's PBS (DPBS) pH

382 7.4 (Gibco) then removed from the flask by gently rinsing with Trypsin-EDTA 0.05% with phenol red  
383 (ThermoFisher). Cells were resuspended in wash buffer [DPBS pH 7.4 + 1% fetal bovine serum (FBS)] then  
384 manually enumerated for count and viability using trypan blue (ThermoFisher). Cells were plated in 96-well  
385 V-bottom plates (Corning) at 100,000 live cells/well, then centrifuged at 1200 g for 5 minutes. Supernatant  
386 was discarded. Cells were co-incubated with gB mAbs at a 3-point, 10x-fold serial dilution starting at 10  
387 µg/mL (10 µg/mL to 0.1 µg/mL), in duplicate for 2 hours at 37°C and 5% CO<sub>2</sub>. Cells were washed and  
388 resuspended in live/dead Near-IR or Aqua cell stain (ThermoFisher) diluted to 1:1000 for 20 minutes  
389 incubation at room temperature. Cells were washed then coincubated with PE-conjugated mouse anti-  
390 human IgG Fc (Southern Biotech) diluted to 1:200 for 30 minutes at 4°C. Cells were washed twice and fixed  
391 with 1% formalin for 15 minutes. Cells were washed twice then resuspended in PBS pH 7.4. Events were  
392 immediately acquired on an LSR II (BD Biosciences) using a high-throughput sampler (HTS). The threshold  
393 for PE positivity was defined as 99% of the PE binding by the anti-CMV pentameric complex mAb TRL310  
394 at 10 µg/mL. The % of PE-positive cells was calculated from the live, GFP-positive cell population and  
395 reported as the average for each sample run in duplicate. Each sample was run in two or more independent  
396 experiments.

397

### 398 *Neutralization*

399 Neutralization was measured by high-throughput Cellomics bioimaging and fluorescence as previously  
400 described (48). In brief, MRC-5 fibroblasts were seeded in 384-well clear, flat-bottom plates then incubated  
401 at 37°C and 5% CO<sub>2</sub> until ~90% confluent. Human CMV virus strains Towne (gB genotype 1), BadrUL131-  
402 GFP (genotype 2), or Toledo (genotype 3) at an MOI=2 were coincubated with mAbs in an 8-point, 3-fold  
403 serial dilution in cell media (RPMI + 10% FBS) for 2 hours at 37°C. All mAbs were coincubated at a starting  
404 concentration of 50 µg/mL (50 µg/mL to 22.9 ng/mL), except the 3-25 mutant mAbs which were coincubated  
405 at a starting concentration of 500 µg/mL (500 µg/mL to 228.6 ng/mL). Virus and antibody mixtures were  
406 added to cells and allowed to incubate for 16 to 24 hours at 37°C and 5% CO<sub>2</sub>. Then, cells were fixed in  
407 3.7% formaldehyde for 10 minutes at room temperature. Plates with Towne virus were stained with mouse  
408 anti-human CMV IE1 (MAB810, Millipore) then goat anti-mouse IgG-AF488 (Millipore). Nuclear staining was  
409 performed in all plates by DAPI (ThermoFischer Scientific). Plates were imaged using a Cellomics



410 CellInsight CX5 fluorescent reader, and the number of total cells and infected cells was enumerated by the  
411 number of cells expressing DAPI and GFP, respectively. The 50% inhibitory concentration (IC<sub>50</sub>) of each  
412 mAb was calculated according to the Reed and Muench method, wherein the IC<sub>50</sub> was defined as the mAb  
413 concentration at which there was 50% maximal infection, based on wells containing cells and virus only.  
414 This calculation was performed in GraphPad Prism version 9.0 using the non-linear regression 4-point  
415 sigmoidal function. Each sample was run in two or more independent experiments.

416

#### 417 *Crystallization and structure determination*

418 The I8 Fab was generated by digesting I8 IgG at 1 mg/mL in PBS pH 7.4 with Lys-C protease at a ratio of  
419 1:4000 (w/w) overnight at 37 °C. The reaction was quenched with a Roche EDTA protein inhibitor tablet  
420 (Sigma-Aldrich) at 1X concentration and the solution was then passed over a CaptureSelect™ IgG-CH1  
421 column (ThermoFischer Scientific) to separate the Fab fragment from the Fc portion. The elution was  
422 concentrated in a 10 kDa molecular weight cutoff Amicon Ultra Centrifugal filter (Millipore Sigma) and  
423 purified by size-exclusion chromatography with a Superdex 200 Increase 10/300 column (GE Healthcare) in  
424 2 mM Tris-Cl pH 8.0, 200 mM NaCl, 0.02% NaN<sub>3</sub> buffer. Purified I8 Fab was concentrated to 12.0 mg/mL in  
425 the aforementioned buffer, mixed with a 2.5-fold molar excess of 1.0 mg/mL gB AD-2S1 peptide (65-  
426 HRANETIYNTTLKYG-79) dissolved in DMSO, and incubated for 30 minutes at 4 °C. Crystallization screens  
427 were then performed using sitting-drop vapor diffusion with 200 nL drop volumes in either 1:1 or 1:2  
428 protein:reservoir mixtures. Within a few days, diffraction-quality crystals formed in a drop composed of a 1:1  
429 ratio of protein:reservoir solution containing 0.2 M magnesium chloride hexahydrate, 25% (w/v) PEG 3350,  
430 and 0.1 M Bis-Tris pH 5.5. Crystals were soaked in reservoir solution supplemented with 20% (v/v) glycerol  
431 before they were plunge frozen in liquid nitrogen. X-ray diffraction data were collected remotely at the 19ID  
432 beamline (Advanced Photon Source, Argonne National Laboratory). Data were indexed and integrated in  
433 iMOSFLM (45) and then merged and scaled to a resolution of 1.80 Å using AIMLESS (46). A Fab homology  
434 model generated from PDB IDs 6ZF0 and 6UOE and the peptide model from PDB 6UOE were used with  
435 PHASER (47) to find a molecular replacement solution. The structure was then iteratively refined in PHENIX  
436 (48) and manually built in Coot (49). All crystallographic software programs used in this project were  
437 compiled and configured by SBGrid (50).

438

439 *Antibody sequence analysis*

440 The clonal membership of TRL345 was determined by partitioning the sequences of 14 mature anti-gB AD-  
441 2S1 mAbs (Patent # US10,030,069B2) into clones using Cloanalyst, version 2007  
442 (<https://www.bu.edu/computationalimmunology/cloanalyst/>). With the 9 observed mature TRL345  
443 sequences as input, we also used Cloanalyst to reconstruct the TRL345 genealogical tree which included  
444 inference of the TRL345 UCA sequence (PMID:24555054). To estimate the probability of antibody  
445 mutations prior to antigenic selection, we used the ARMADiLLO program (<https://armadillo.dhvi.duke.edu/>),  
446 which computationally simulates somatic hypermutation (27).

447

448 *Software*

449 Phylogenetic analysis was performed using Cloanalyst version 7. Mutation analysis was performed using  
450 ARMADiLLO. Statistical tests were performed in GraphPad Prism version 9.0. Figures were created in  
451 GraphPad Prism version 9.0. Figure 4 was created in PyMOL version 2.4.1 (Schödinger, LLC).

452

453 *Statistical analyses*

454 Statistical tests were performed as described in the figure legends, where applicable. Nonlinear regression  
455 curve fitting was performed to calculate the EC<sub>50</sub> and IC<sub>50</sub> values. The relative contribution of individual  
456 amino acid mutations to mAb neutralization function was calculated by linear regression. Statistical  
457 significance was calculated using a nonparametric two-tailed Wilcoxon matched-pairs signed-rank test. All  
458 tests were performed in GraphPad Prism version 9.0.

459 **Supplementary materials**

460 Fig. S1. Gating strategy to determine the % of binding to cell-associated gB.

461 Fig. S2. The VH A33N mutation was both necessary and sufficient for high gB AD-2 binding, binding to cell-  
462 associated gB, and neutralization function.

463 Fig. S3. Introduction of the VH A33G mutation to the UCA of either the TRL345 or 3-25 lineages did not  
464 confer neutralizing function.

465 Fig. S4. Sequence alignment of anti-gB AD-2S1 mAbs from the TRL345 and 3-25 lineages.

466 Table S1. Compiled binding and neutralization responses for TRL345 lineage mAbs and 3-25 mature mAb.

467 Table S2. Mutational probability analysis using ARMADiLLO algorithm.

468 Table S3. X-ray crystallographic data collection and refinement statistics.

## References

1. C. N. Kotton *et al.*, The Third International Consensus Guidelines on the Management of Cytomegalovirus in Solid-organ Transplantation. *Transplantation* **102**, 900-931 (2018).
2. W. D. Rawlinson *et al.*, Congenital cytomegalovirus infection in pregnancy and the neonate: consensus recommendations for prevention, diagnosis, and therapy. *Lancet Infect Dis* **17**, e177-e188 (2017).
3. K. B. Fowler *et al.*, The outcome of congenital cytomegalovirus infection in relation to maternal antibody status. *N Engl J Med* **326**, 663-667 (1992).
4. C. C. Morton, W. E. Nance, Newborn hearing screening--a silent revolution. *N Engl J Med* **354**, 2151-2164 (2006).
5. R. B. Effros, The silent war of CMV in aging and HIV infection. *Mech Ageing Dev* **158**, 46-52 (2016).
6. in *Vaccines for the 21st Century: A Tool for Decisionmaking*, K. R. Stratton, J. S. Durch, R. S. Lawrence, Eds. (Washington (DC), 2000).
7. K. M. Anderholm, C. J. Bierle, M. R. Schleiss, Cytomegalovirus Vaccines: Current Status and Future Prospects. *Drugs* **76**, 1625-1645 (2016).
8. A. L. Vanarsdall, P. W. Howard, T. W. Wisner, D. C. Johnson, Human Cytomegalovirus gH/gL Forms a Stable Complex with the Fusion Protein gB in Virions. *PLoS Pathog* **12**, e1005564 (2016).
9. W. J. Britt, Neutralizing antibodies detect a disulfide-linked glycoprotein complex within the envelope of human cytomegalovirus. *Virology* **135**, 369-378 (1984).
10. R. F. Pass *et al.*, Vaccine prevention of maternal cytomegalovirus infection. *N Engl J Med* **360**, 1191-1199 (2009).
11. D. I. Bernstein *et al.*, Safety and efficacy of a cytomegalovirus glycoprotein B (gB) vaccine in adolescent girls: A randomized clinical trial. *Vaccine* **34**, 313-319 (2016).
12. P. D. Griffiths *et al.*, Cytomegalovirus glycoprotein-B vaccine with MF59 adjuvant in transplant recipients: a phase 2 randomised placebo-controlled trial. *Lancet* **377**, 1256-1263 (2011).
13. M. Backovic, T. S. Jardetzky, Class III viral membrane fusion proteins. *Adv Exp Med Biol* **714**, 91-101 (2011).
14. C. S. Nelson, B. C. Herold, S. R. Permar, A new era in cytomegalovirus vaccinology: considerations for rational design of next-generation vaccines to prevent congenital cytomegalovirus infection. *NPJ Vaccines* **3**, 38 (2018).
15. S. Pöttsch *et al.*, B cell repertoire analysis identifies new antigenic domains on glycoprotein B of human cytomegalovirus which are target of neutralizing antibodies. *PLoS Pathog* **7**, e1002172 (2011).
16. L. M. Kauvar *et al.*, A high-affinity native human antibody neutralizes human cytomegalovirus infection of diverse cell types. *Antimicrob Agents Chemother* **59**, 1558-1568 (2015).
17. H. G. Burke, E. E. Heldwein, Crystal Structure of the Human Cytomegalovirus Glycoprotein B. *PLoS Pathog* **11**, e1005227 (2015).

- 507 18. K. Ishibashi *et al.*, Lack of antibodies against the antigen domain 2 epitope of cytomegalovirus  
508 (CMV) glycoprotein B is associated with CMV disease after renal transplantation in recipients having  
509 the same glycoprotein H serotypes as their donors. *Transpl Infect Dis* **13**, 318-323 (2011).
- 510 19. I. Baraniak *et al.*, Epitope-Specific Humoral Responses to Human Cytomegalovirus Glycoprotein-B  
511 Vaccine With MF59: Anti-AD2 Levels Correlate With Protection From Viremia. *J Infect Dis* **217**,  
512 1907-1917 (2018).
- 513 20. K. M. Bialas *et al.*, Maternal Antibody Responses and Nonprimary Congenital Cytomegalovirus  
514 Infection of HIV-1-Exposed Infants. *J Infect Dis* **214**, 1916-1923 (2016).
- 515 21. A. C. Finnefrock *et al.*, Preclinical evaluations of peptide-conjugate vaccines targeting the antigenic  
516 domain-2 of glycoprotein B of human cytomegalovirus. *Hum Vaccin Immunother* **12**, 2106-2112  
517 (2016).
- 518 22. G. R. McLean *et al.*, Recognition of human cytomegalovirus by human primary immunoglobulins  
519 identifies an innate foundation to an adaptive immune response. *J Immunol* **174**, 4768-4778 (2005).
- 520 23. L. Xia *et al.*, Active evolution of memory B-cells specific to viral gH/gL/pUL128/130/131 pentameric  
521 complex in healthy subjects with silent human cytomegalovirus infection. *Oncotarget* **8**, 73654-  
522 73669 (2017).
- 523 24. K. M. McCutcheon *et al.*, Multiplexed screening of natural humoral immunity identifies antibodies at  
524 fine specificity for complex and dynamic viral targets. *MAbs* **6**, 460-473 (2014).
- 525 25. H. X. Liao *et al.*, Co-evolution of a broadly neutralizing HIV-1 antibody and founder virus. *Nature*  
526 **496**, 469-476 (2013).
- 527 26. M. Bonsignori *et al.*, Inference of the HIV-1 VRC01 Antibody Lineage Unmutated Common Ancestor  
528 Reveals Alternative Pathways to Overcome a Key Glycan Barrier. *Immunity* **49**, 1162-1174 e1168  
529 (2018).
- 530 27. K. Wiehe *et al.*, Functional Relevance of Improbable Antibody Mutations for HIV Broadly Neutralizing  
531 Antibody Development. *Cell Host Microbe* **23**, 759-765 e756 (2018).
- 532 28. K. O. Saunders *et al.*, Targeted selection of HIV-specific antibody mutations by engineering B cell  
533 maturation. *Science* **366**, (2019).
- 534 29. J. Jardine *et al.*, Rational HIV immunogen design to target specific germline B cell receptors.  
535 *Science* **340**, 711-716 (2013).
- 536 30. Y. Fu *et al.*, A broadly neutralizing anti-influenza antibody reveals ongoing capacity of  
537 haemagglutinin-specific memory B cells to evolve. *Nat Commun* **7**, 12780 (2016).
- 538 31. P. Pham, R. Bransteitter, J. Petruska, M. F. Goodman, Processive AID-catalysed cytosine  
539 deamination on single-stranded DNA simulates somatic hypermutation. *Nature* **424**, 103-107 (2003).
- 540 32. M. Zydek *et al.*, HCMV infection of human trophoblast progenitor cells of the placenta is neutralized  
541 by a human monoclonal antibody to glycoprotein B and not by antibodies to the pentamer complex.  
542 *Viruses* **6**, 1346-1364 (2014).
- 543 33. A. Macagno *et al.*, Isolation of human monoclonal antibodies that potently neutralize human  
544 cytomegalovirus infection by targeting different epitopes on the gH/gL/UL128-131A complex. *J Virol*  
545 **84**, 1005-1013 (2010).

- 546 34. M. Ohlin, C. A. Borrebaeck, Characteristics of human antibody repertoires following active immune  
547 responses in vivo. *Mol Immunol* **33**, 583-592 (1996).
- 548 35. X. Ye *et al.*, Recognition of a highly conserved glycoprotein B epitope by a bivalent antibody  
549 neutralizing HCMV at a post-attachment step. *PLoS Pathog* **16**, e1008736 (2020).
- 550 36. X. Cui *et al.*, Novel trimeric human cytomegalovirus glycoprotein B elicits a high-titer neutralizing  
551 antibody response. *Vaccine* **36**, 5580-5590 (2018).
- 552 37. S. Chandramouli *et al.*, Structure of HCMV glycoprotein B in the postfusion conformation bound to a  
553 neutralizing human antibody. *Nat Commun* **6**, 8176 (2015).
- 554 38. J. A. Jenks *et al.*, Antibody binding to native cytomegalovirus glycoprotein B predicts efficacy of the  
555 gB/MF59 vaccine in humans. *Sci Transl Med* **12**, (2020).
- 556 39. F. W. Alt, Y. Zhang, F. L. Meng, C. Guo, B. Schwer, Mechanisms of programmed DNA lesions and  
557 genomic instability in the immune system. *Cell* **152**, 417-429 (2013).
- 558 40. C. Keim, D. Kazadi, G. Rothschild, U. Basu, Regulation of AID, the B-cell genome mutator. *Genes*  
559 *Dev* **27**, 1-17 (2013).
- 560 41. M. Ohlin, A new look at a poorly immunogenic neutralization epitope on cytomegalovirus  
561 glycoprotein B. Is there cause for antigen redesign? *Mol Immunol* **60**, 95-102 (2014).
- 562 42. X. Ye *et al.*, Identification of adipocyte plasma membrane-associated protein as a novel modulator of  
563 human cytomegalovirus infection. *PLoS Pathog* **15**, e1007914 (2019).
- 564 43. C. A. Thomson *et al.*, Germline V-genes sculpt the binding site of a family of antibodies neutralizing  
565 human cytomegalovirus. *EMBO J* **27**, 2592-2602 (2008).
- 566 44. J. S. McLellan *et al.*, Structure-based design of a fusion glycoprotein vaccine for respiratory syncytial  
567 virus. *Science* **342**, 592-598 (2013).
- 568 45. J. S. McLellan *et al.*, Structure of RSV fusion glycoprotein trimer bound to a prefusion-specific  
569 neutralizing antibody. *Science* **340**, 1113-1117 (2013).
- 570 46. Y. Liu *et al.*, Prefusion structure of human cytomegalovirus glycoprotein B and structural basis for  
571 membrane fusion. *Sci Adv* **7**, (2021).
- 572 47. D. R. Burton, L. Hangartner, Broadly Neutralizing Antibodies to HIV and Their Role in Vaccine  
573 Design. *Annu Rev Immunol* **34**, 635-659 (2016).
- 574 48. C. S. Nelson *et al.*, HCMV glycoprotein B subunit vaccine efficacy mediated by nonneutralizing  
575 antibody effector functions. *Proc Natl Acad Sci U S A* **115**, 6267-6272 (2018).

576

577

## 578 **Acknowledgements**

579 We would like to acknowledge our many wonderful collaborators for their support. In particular, we would  
580 like to thank Zhiqiang An and Xiaohua Ye for providing plasmids and antibodies and Tong-Ming Fu, Dai  
581 Wang, Zhiqiang An, Micah Luftig, and Rory Henderson for their consultation and guidance.

582

## 583 **Funding**

584 This work was supported by NIH F30 to J.A.J. (F30-HD100170-01A1), Triangle Center of Evolutionary  
585 Medicine Graduate Student Award to J.A.J., National CMV Foundation Early Career Award to J.A.J., Welch  
586 Foundation grant to J.S.M. (F-0003-19620604), NIH R21 to S.R.P. (R21-AI147992-01), and Medearis CMV  
587 Scholars Program Award to J.A.J. Results shown in this report are derived from work performed at Argonne  
588 National Laboratory, Structural Biology Center (SBC) at the Advanced Photon Source. SBC-CAT is  
589 operated by UChicago Argonne, LLC, for the U.S. Department of Energy, Office of Biological and  
590 Environmental Research under contract DE-AC02-06CH11357. The funders had no role in study design,  
591 data collection and interpretation, decision to publish, or preparation of this manuscript. The content is  
592 solely the responsibility of the authors and does not necessarily represent the official views of the NIH.

593

## 594 **Author contributions**

595 Study aims and design were conceived by J.A.J. under the mentorship of K.W. and S.R.P. Funding was  
596 acquired by J.A.J., J.S.M., and S.R.P. Phylogenetic mapping was performed by S.V. and K.W. Antibody  
597 design and production were performed by J.A.J., A.K., and J.T. Antibody binding and neutralization  
598 functions were measured by J.A.J. and S.A. Structural studies were performed by M.R.S., D.W., and J.S.M.  
599 This study was performed under supervision of K.W., J.S.M., and S.R.P.

600

## 601 **Competing interests**

602 J.A.J. has been a paid invited speaker by Moderna x Popsugar. S.R.P. serves as a consultant for Moderna,  
603 Merck, Dynavax, Pfizer, and Hookipa CMV vaccine programs and has a sponsored research program on  
604 CMV vaccine immunogenicity with Moderna and Merck.

605

606 **Data and materials availability**

607 All data and materials used in the analysis are available in the main text or the supplementary materials.



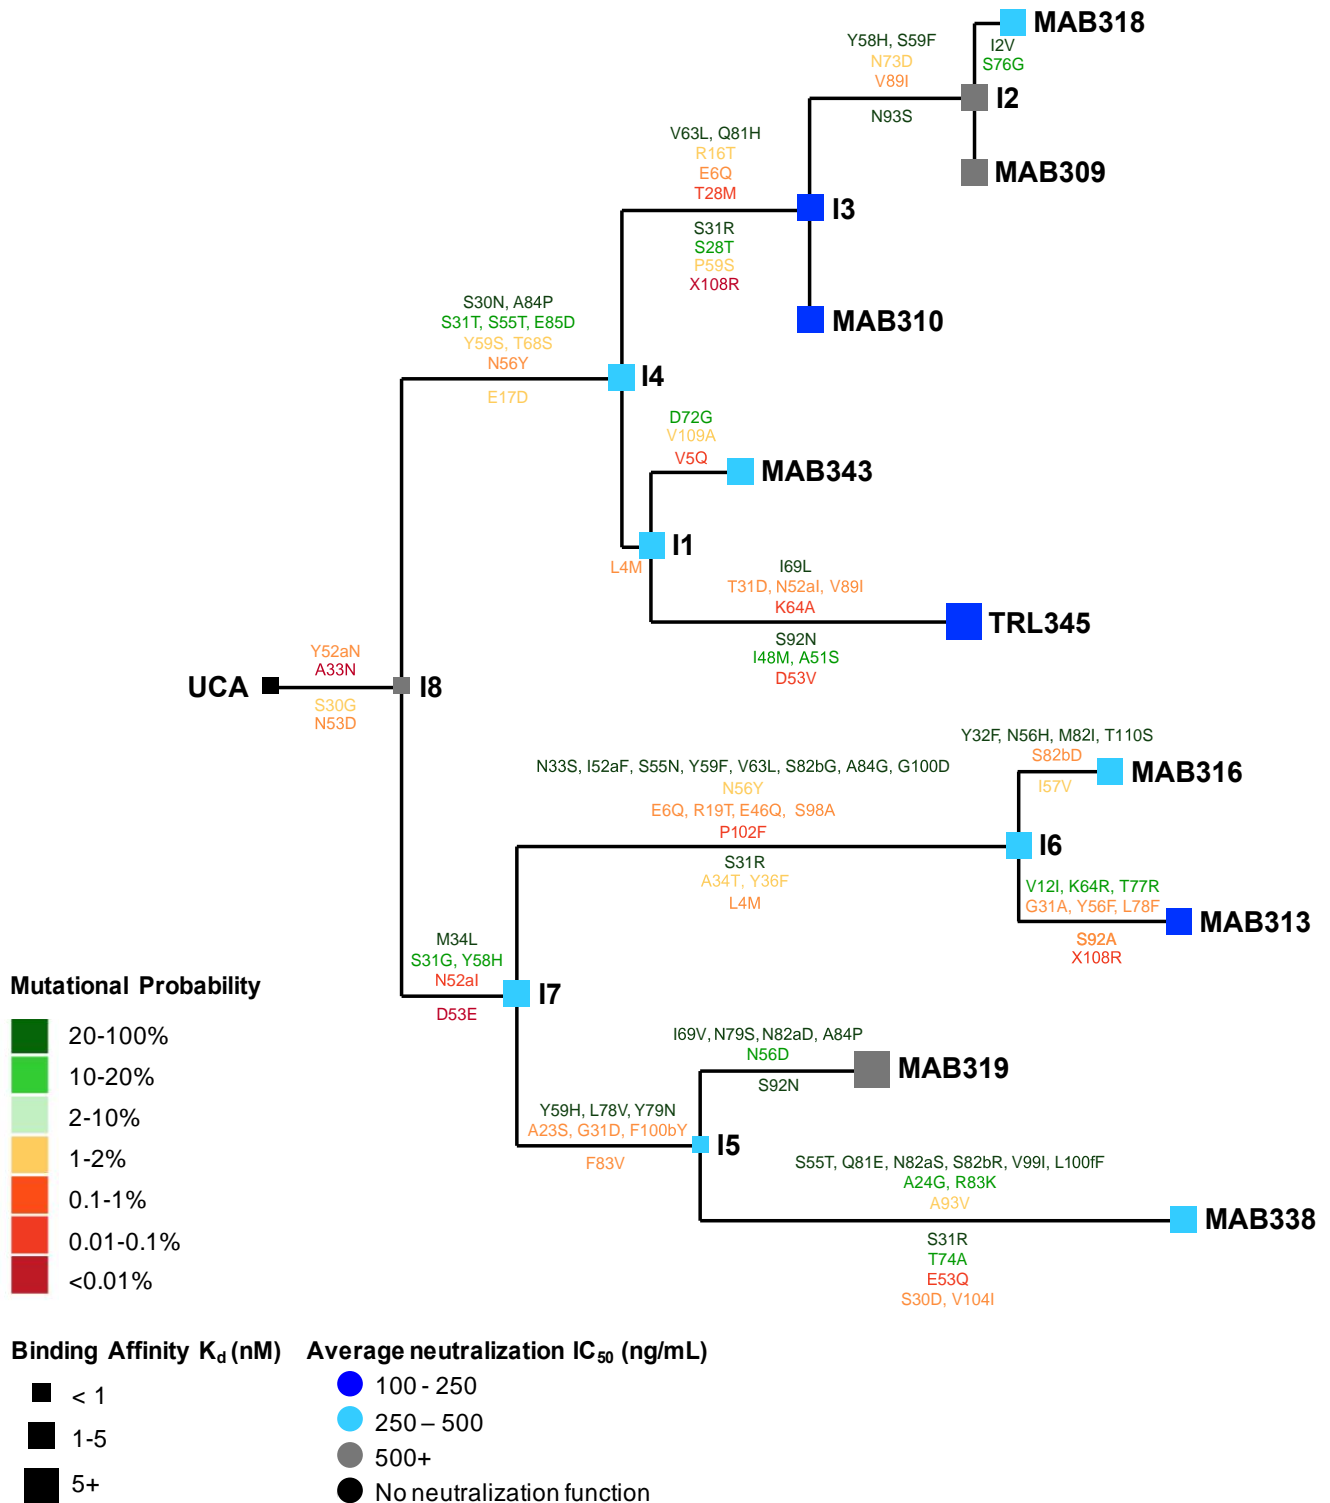

608

609 **Fig. 1. mAb binding to gB AD-2 and CMV neutralization improved along TRL345 lineage maturation.**

610 We identified 9 clonally related mature mAbs for phylogenetic relatedness, with the phylogenetic tree  
 611 showing the relatedness using Cloanlyst, and produced clonal lineage mAbs. We measured mAb binding  
 612 affinity by SPR and neutralization of the Towne, AD169rUL131-GFP, and Toledo CMV strains on MRC-5  
 613 fibroblasts. We reported the binding affinity to gB AD-2S1 peptide as the K<sub>d</sub> (nM), calculated as the k<sub>a</sub>/k<sub>d</sub>,  
 614 from low binding affinity (<1 nM, small box) moderate (1-5 nM, medium) to large (>5 nM, large). CMV  
 615 neutralization is reported as the average IC<sub>50</sub> across all three CMV strains on fibroblasts. The estimated  
 616 mutations occurring at each transition along lineage maturation are shown above and below the lines of the

617 lineage tree for the heavy and light chains, respectively, and amino acids are numbered according to the  
618 Kabat scheme. The probability of a given mutation occurring in the absence of B cell selection was  
619 calculated using the ARMADiLLO algorithm, which computationally simulates hypermutation. The  
620 mutational probabilities are shown from high probability (>10%, dark green) to moderate (2-10%, light  
621 green) to low (<2%, yellow to red text).

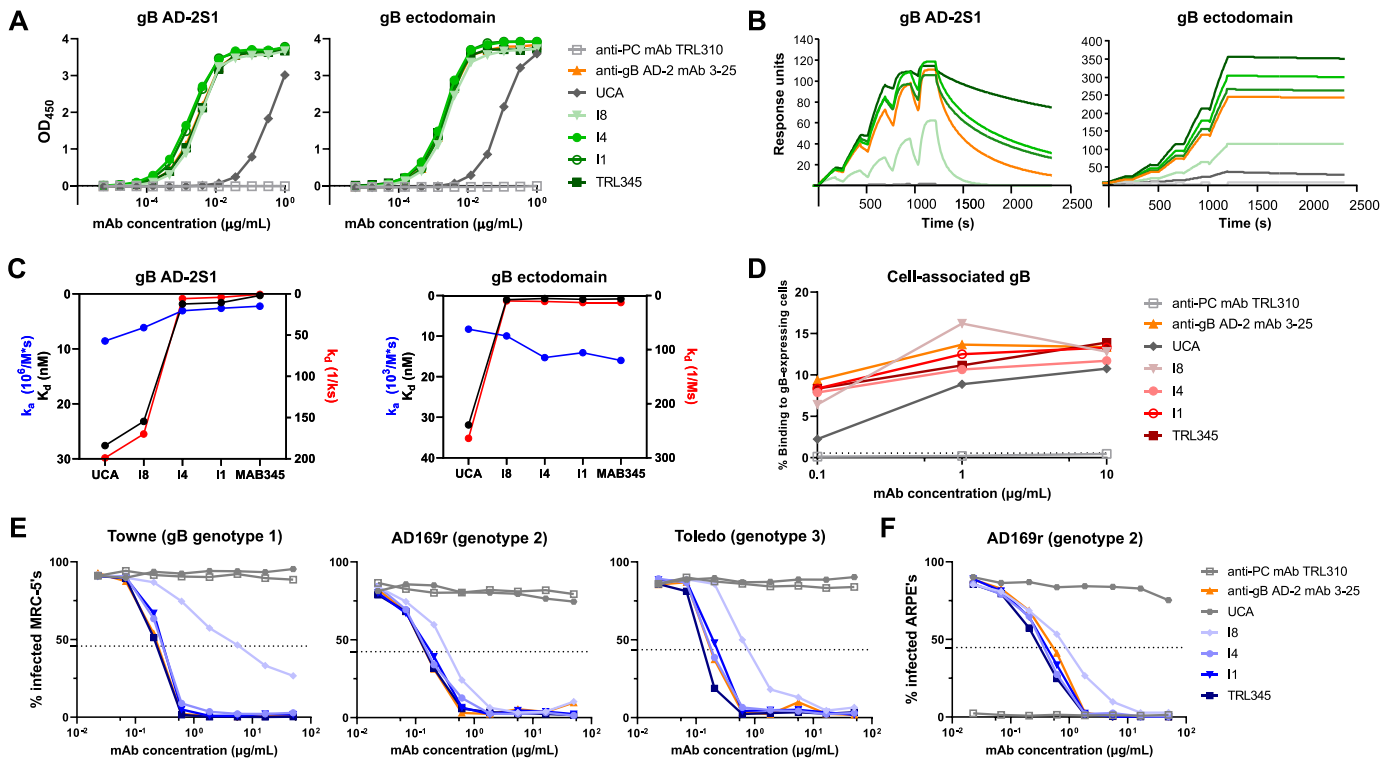

**Fig. 2. The TRL345 UCA acquired high binding to gB AD-2S1 and broad CMV neutralization function early in lineage development.** We produced the 17 clonally related mAbs of the TRL345 lineage and quantified antigen binding and neutralization functions. Shown here are the responses of the lineage ancestors of TRL345:

- (A) Binding magnitude to gB AD-2S1 peptide and gB ectodomain by ELISA.  
 (B) Binding to and avidity for gB AD-2S1 peptide and gB ectodomain by SPR.  
 (C) Binding coefficients for gB AD-2S1 peptide and gB ectodomain by SPR.  $K_d$  (nM) was calculated as  $k_d/k_a$ .  
 (D) Binding to cell-associated gB. Binding of mAbs was determined by coincubating mAbs in a serial dilution with HEK293T epithelial cells-transfected with full-length gB and GFP. The % binding was calculated as the % of GFP-expressing cells bound by the anti-gB AD-2 mAb, detected by flow cytometry.  
 (E) Neutralization of CMV strains Towne, AD169rUL131-GFP (AD169r), and Toledo on MRC-5 fibroblasts.  
 (F) Neutralization of AD169rUL131-GFP on ARPE epithelial cells.

Each experiment was run with the negative control anti-CMV pentameric complex (PC) mAb TRL310 and positive control anti-CMV gB AD-2 mAb 3-25. For each figure, data are shown from one experiment, as the mean of two samples run in duplicate. Each figure is representative of results from two or more independent experiments.

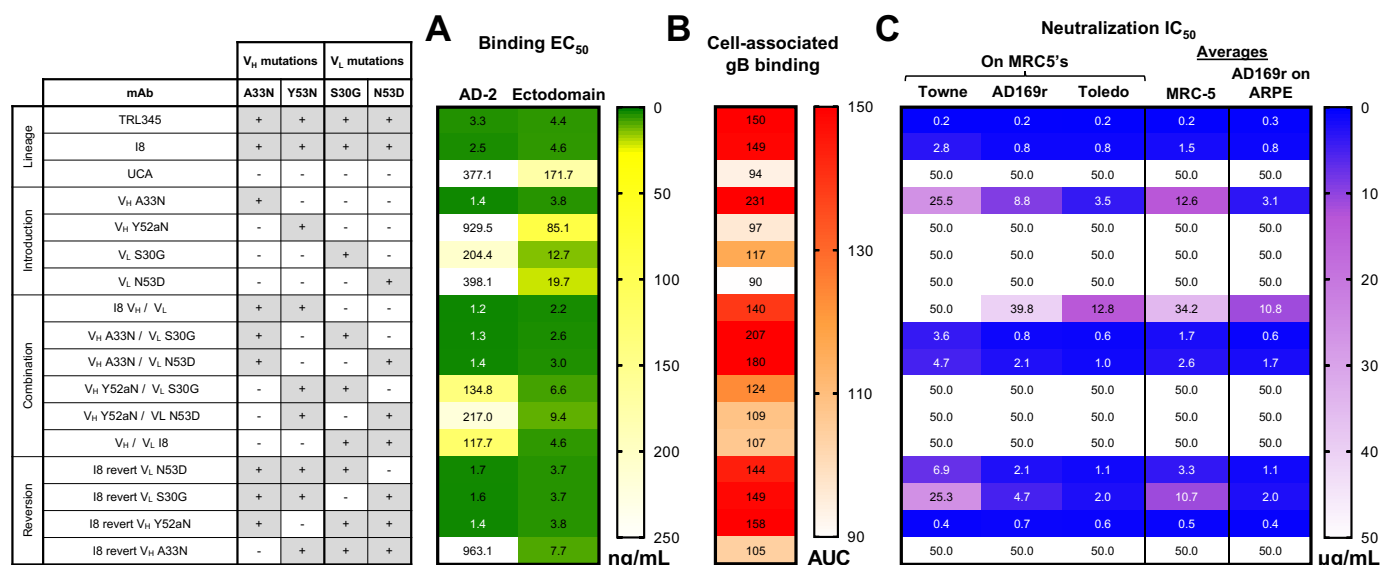

42

43

44

45

46

**Fig. 3. The V<sub>H</sub> A33N mutation was both necessary and sufficient for high gB AD-2 binding, binding to cell-associated gB, and neutralization function.** We produced 14 mutant mAbs wherein we introduced single early, improbable mutations or combinations of mutations to the UCA V<sub>H</sub> and V<sub>L</sub> chains then measured the following:

47

48

49

50

51

52

53

54

55

56

57

58

59

60

61

62

- (A) Binding magnitude of mutant mAbs to gB AD-2S1 peptide and gB ectodomain by ELISA. Data are reported as the mean ELISA EC<sub>50</sub> (ng/mL) of two or more independent experiments, and the heatmap is colored from high (<50.0 ng/mL, dark green) to moderate (100.0 ng/mL, yellow) to low (>250.0 ng/mL, white) binding.
- (B) Binding magnitude to cell-associated gB. Binding to HEK293T epithelial cells-transfected with full-length gB was measured in a three-point, 10-fold mAb serial dilution starting at 0.1 µg/mL, to gB-transfected cells and was reported as the area-under-the-curve (AUC). Data are reported as the mean binding AUC of two or more independent experiments, and the heatmap is colored from high (>300 AUC, red) to moderate (200 AUC, orange) to low (<100 AUC, white) binding.
- (C) Neutralization of CMV strains Towne, AD169rUL131-GFP (AD169r), and Toledo on MRC-5 fibroblasts and AD169r on ARPE epithelial cells. Data are reported as the mean neutralization IC<sub>50</sub> of two or more independent experiments. The average neutralization on MRC-5's was calculated as the mean neutralization of the average Towne, AD169r, and Toledo neutralization IC<sub>50</sub>'s; the average neutralization on ARPE's was reported as the mean neutralization of the AD169r strain. The heatmap is colored from high (<1.0 µg/mL, blue) to moderate (20.0 µg/mL, purple) to no (>50.0 µg/mL white) neutralization potency.

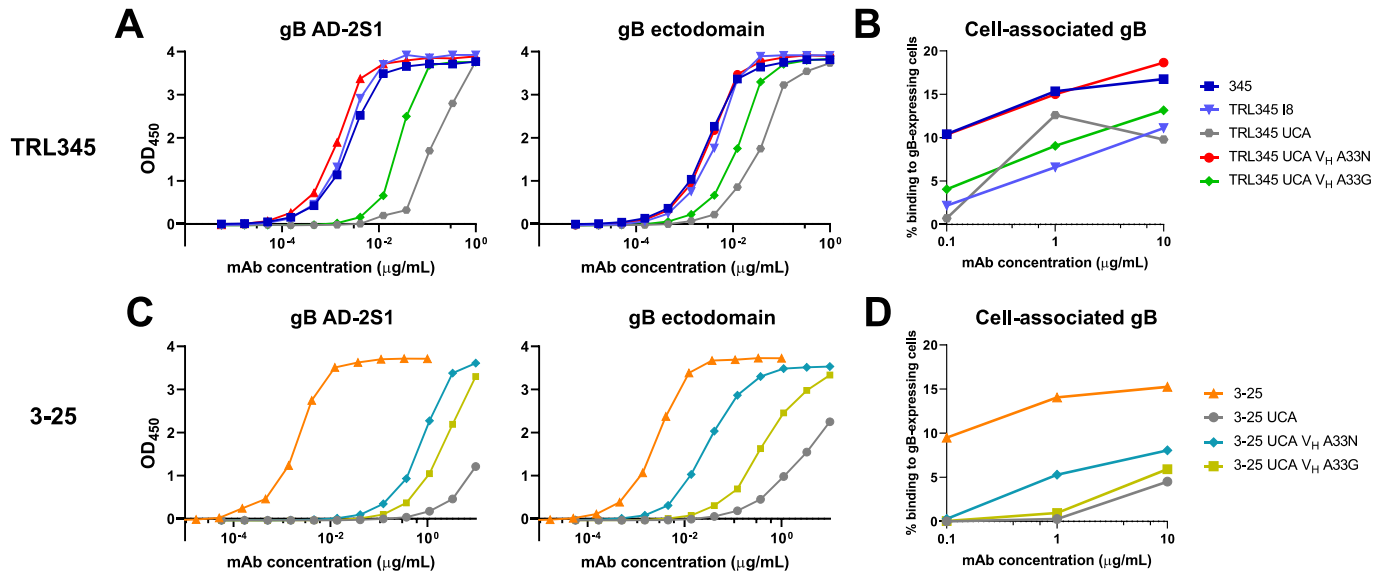

663  
664 **Fig. 4. Introduction of V<sub>H</sub> A33N, as compared with V<sub>H</sub> A33G, conferred higher binding to gB AD-2S1,**  
665 **gB ectodomain, and cell-associated gB for both the TRL345 UCA and 3-25 UCA antibodies.** We  
666 produced 4 mutant mAbs wherein we introduced V<sub>H</sub> A33N or A33G mutations to the TRL345 UCA V<sub>H</sub> or 3-  
667 25 UCA V<sub>H</sub> and measured the following:

- 668 (A) Binding magnitude of TRL345 mutant mAbs to gB AD-2S1 peptide and gB ectodomain by ELISA.  
669 (B) Binding of TRL345 mutant mAbs to cell-associated gB. Binding of mAbs was determined by  
670 coinubating mAbs in a serial dilution with HEK293T epithelial cells-transfected with full-length gB  
671 and GFP. The % binding was calculated as the % of GFP-expressing cells bound by the anti-gB AD-  
672 2 mAb, detected by flow cytometry.  
673 (C) Binding magnitude of 3-25 mutant mAbs to gB AD-2S1 peptide and gB ectodomain by ELISA.  
674 (D) Binding to 3-25 mutant mAbs to cell-associated gB.  
675

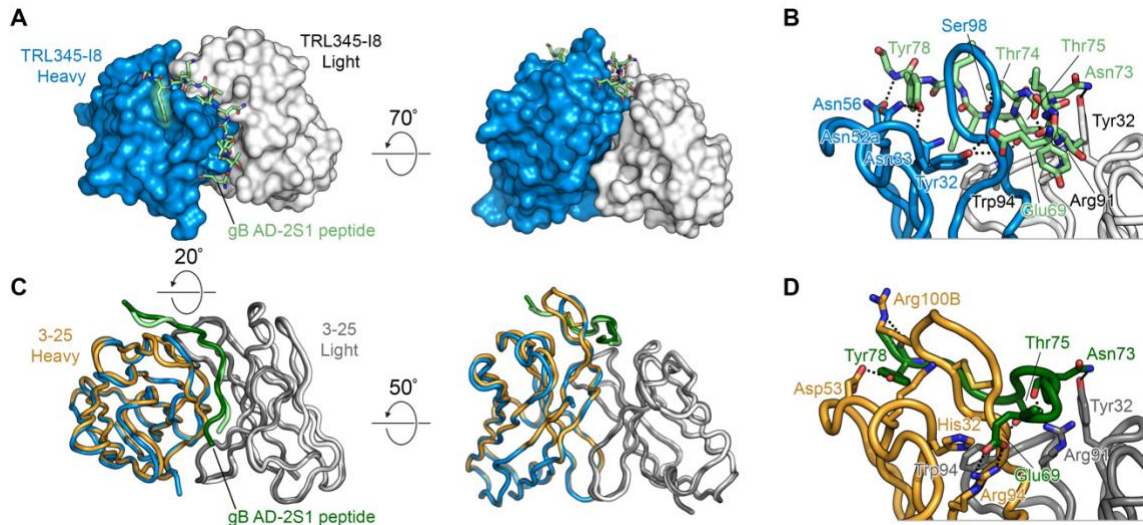

676

677

**Fig. 5. Crystal structure of anti-CMV gB AD-2 Fab bound to gB AD-2S1 peptide.**

678

679

680

681

682

683

684

685

686

687

688

- (A) In the TRL345 lineage, the I8 Fab is shown as a molecular surface, with the heavy chain in blue and light chain in white. The gB AD-2S1 peptide is shown as light-green sticks, with residues that form hydrophobic contacts with the TRL345 I8 Fab shown as transparent light green surfaces.
- (B) The TRL345 I8 Fab is shown as a cartoon with residues that contact the gB AD-2S1 peptide shown as sticks. Hydrogen bonds and salt bridges are shown as black dotted lines.
- (C) As a comparison between the TRL345 I8 structure and the previously published 3-25 structure, the two Fabs are overlaid. The TRL345 I8 heavy and light chains are shown in blue and white, respectively, bound to the gB AD-2S1 peptide in light green. The 3-25 heavy and light chains are shown in orange and gray, respectively, bound to the gB AD-2S1 peptide in dark green.
- (D) The previously published 3-25 structure is shown as a cartoon with residues that contact the gB AD-2S1 peptide shown as sticks.
